# Supplementary material
Source: PubMed Central journal article supplement (PMC4833614)
Supplement: NIHMS746602-supplement-supplement_1.pdf [file NIHMS746602-supplement-supplement_1.pdf]

## Online Appendix A: Round Two Statistical Feedback to Participants Describing Round One Results

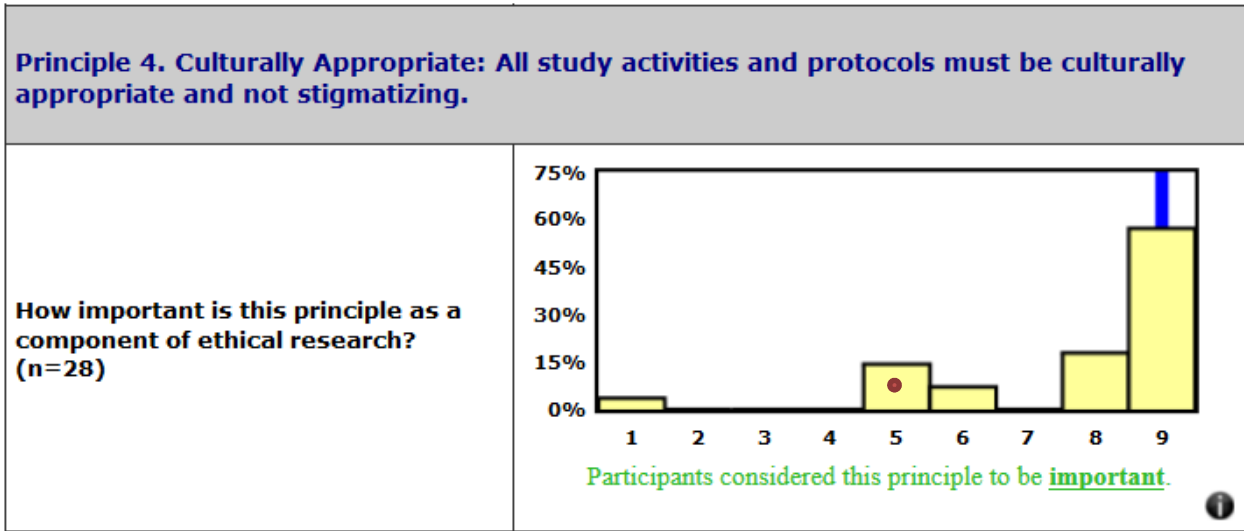

Note: Red dot indicates an individual response of a given participant. A blue line indicates a median response of the panel. A statement below the bar chart was a summary of a group response, automatically determined based on the RAND/UCLA Appropriateness Method.
